# Supplementary material
Source: PubMed Central journal article supplement (PMC3702637)
Supplement: NIHMS478824-supplement-1.pdf [file NIHMS478824-supplement-1.pdf]

**Qiao et al**

**Supplemental Fig. 1. The expression and activity of Akt-1 and Akt-2 in primary mouse CD4<sup>+</sup> T cells.** CD4<sup>+</sup> T cells from BALB/c mice were stimulated with anti-CD3 for 5 min, and lysed. The cell lysates were immunoprecipitated with anti-Akt-1 and anti-Akt-2, respectively, and blotted with anti-phospho-Akt. The membranes were reprobed with anti-Akt-1 and anti-Akt-2, respectively. Aliquots of cell lysates were blotted with anti-actin.
