# Supplementary material
Source: PubMed Central journal article supplement (PMC3702637)

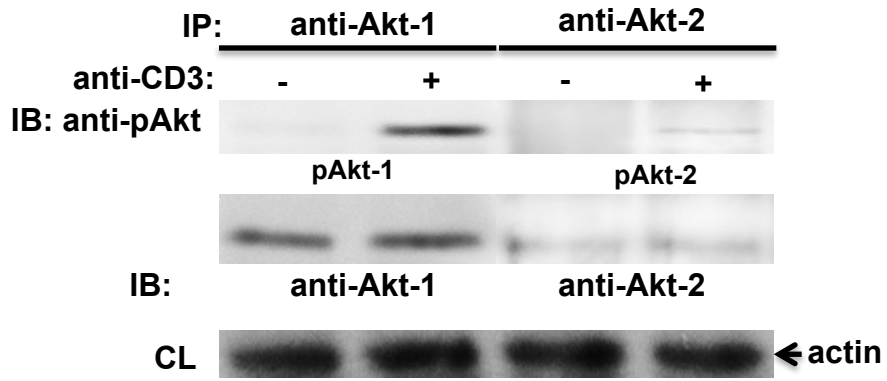

Supplement: NIHMS478824-supplement-2.pdf [file NIHMS478824-supplement-2.pdf]
